# Supplementary material
Source: PubMed Central journal article supplement (PMC6551577)
Supplement: jamapsychiatry-76-893-s003.pdf [file jamapsychiatry-76-893-s003.pdf]

# Data Sharing Statement

Daly. Efficacy of Esketamine Nasal Spray Plus Oral Antidepressant Treatment for Relapse Prevention in Patients With Treatment-Resistant Depression. *JAMA Psychiatry*. Published June 05, 2019. 10.1001/jamapsychiatry.2019.1189

## Data

**Data available:** Yes

**Data types:** Deidentified participant data

**How to access data:** <https://www.janssen.com/clinical-trials/transparency>. <http://yoda.yale.edu>.

**When available:** With publication

## Supporting Documents

**Document types:** Other (please specify)

**Additional Information:** The data sharing policy of Janssen Pharmaceutical Companies of Johnson & Johnson is available at <https://www.janssen.com/clinical-trials/transparency>. As noted on this site, requests for access to the study data can be submitted through Yale Open Data Access (YODA) Project site at <http://yoda.yale.edu>.

**How to access documents:** The data sharing policy of Janssen Pharmaceutical Companies of Johnson & Johnson is available at <https://www.janssen.com/clinical-trials/transparency>. As noted on this site, requests for access to the study data can be submitted through Yale Open Data Access (YODA) Project site at <http://yoda.yale.edu>.

**When available:** With publication

## Additional Information

**Who can access the data:** The data sharing policy of Janssen Pharmaceutical Companies of Johnson & Johnson is available at <https://www.janssen.com/clinical-trials/transparency>. As noted on this site, requests for access to the study data can be submitted through Yale Open Data Access (YODA) Project site at <http://yoda.yale.edu>.

**Types of analyses:** The data sharing policy of Janssen Pharmaceutical Companies of Johnson & Johnson is available at <https://www.janssen.com/clinical-trials/transparency>. As noted on this site, requests for access to the study data can be submitted through Yale Open Data Access (YODA) Project site at <http://yoda.yale.edu>.

**Mechanisms of data availability:** The data sharing policy of Janssen Pharmaceutical Companies of Johnson & Johnson is available at <https://www.janssen.com/clinical-trials/transparency>. As noted on this site, requests for access to the study data can be submitted through

Yale Open Data Access (YODA) Project site at <http://yoda.yale.edu>.
